# Supplementary material for: The lineage stability and suppressive program of regulatory T cells require protein O-GlcNAcylation
Source: PubMed Central journal article supplement (PMC6341091; doi:10.1038/s41467-019-08300-3), 2019-01-21
Supplement: 41467_2019_8300_MOESM3_ESM.pdf [file 41467_2019_8300_MOESM3_ESM.pdf]

## **Description of Additional Supplementary Files**

### **Supplementary Data 1:**

**Identification of FOXP3 O-GlcNAcylation sites.** Top, sequence, location, and HexNAc sites of O-GlcNAcylated peptides identified by Mass Spectrometry. Bottom, full sequence of the purified mouse FOXP3 protein used for Mass Spectrometry, with annotations on tags and covered regions.
